# Supplementary material for: Testing and development of transfer functions for weighing precipitation gauges in WMO-SPICE
Source: Copernicus journal article supplement (doi:10.5194/hess-22-1437-2018), 2018-02-27
Supplement: Supplementary file 1 [file hess-22-1437-2018-supplement.pdf]

Supplement of Hydrol. Earth Syst. Sci., 22, 1437–1452, 2018  
<https://doi.org/10.5194/hess-22-1437-2018-supplement>  
© Author(s) 2018. This work is distributed under  
the Creative Commons Attribution 3.0 License.

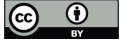

*Supplement of*

## **Testing and development of transfer functions for weighing precipitation gauges in WMO-SPICE**

**John Kochendorfer et al.**

*Correspondence to:* John Kochendorfer ([john.kochendorfer@noaa.gov](mailto:john.kochendorfer@noaa.gov))

The copyright of individual parts of the supplement might differ from the CC BY 3.0 License.

## Transfer functions

Transfer function coefficients for the transfer functions that were developed, tested, and recommended are listed in Tables 1 – 4. The equations used in the tables are included here for ease of reference:

$$CE = e^{-a(U)(1 - \tan^{-1}(b(T_{air})) + c)} \quad (1)$$

- 5 where  $CE$  is the catch efficiency,  $U$  is the mean wind speed,  $T_{air}$  is the mean air temperature, and  $a$ ,  $b$ , and  $c$  are coefficients fit to the data. Equation 2 was also fit to the precipitation measurements:

$$CE = (a)e^{-b(U)} + c \quad (2)$$

- where  $a$ ,  $b$ , and  $c$  are coefficients fit to the data. Equation 1 was fit as a function of wind speed and air temperature, while Equation 2 was fit separately to solid and mixed precipitation measurements as a function of wind speed only. In the latter case, precipitation type was determined using air temperature, with solid precipitation defined as  $T_{air} < -2$  °C, and mixed defined as  $2$  °C  $\geq T_{air} \geq -2$  °C. For some of the gauges examined here, Eq. 2 unrealistically over-predicted catch efficiency at low wind speeds when insufficiently constrained by the available measurements, and in these cases a more constrained function was used to describe realistic corrections:

$$CE = (a)e^{-b(U)} + (1 - a), \quad (3)$$

## 15 Tables

| Wind Speed   | Eq. 3, $f(U, \text{mixd})$ |         | Eq. 3, $f(U, \text{solid})$ |        | Eq. 1 $f(U, T_{air})$ |      |      | $U_{thresh}$<br>( $\text{m s}^{-1}$ ) |
|--------------|----------------------------|---------|-----------------------------|--------|-----------------------|------|------|---------------------------------------|
|              | $a$                        | $b$     | $a$                         | $b$    | $a$                   | $b$  | $c$  |                                       |
| $f(U_{GH})$  | 23.3                       | 0.00227 | 4.00                        | 0.0334 | 0.0633                | 0.67 | 0.26 | 6.1                                   |
| $f(U_{10m})$ | 19.7                       | 0.00196 | 4.53                        | 0.0215 | 0.0465                | 0.66 | 0.25 | 8                                     |

**Table S1. Shielded MRW500 transfer function coefficients for gauge-height (GH) and 10 m wind speeds. Coefficients for Eq. 3 and Eq. 1 are provided, along with the maximum wind speed threshold ( $U_{thresh}$ ), above which the transfer function should be applied by forcing the wind speed down to  $U_{thresh}$ .**

| Wind Speed   | Eq. 2, $f(U, \text{mixd})$ |        |      | Eq. 2, $f(U, \text{solid})$ |       |      | Eq. 1 $f(U, T_{air})$ |        |      | $U_{thresh}$<br>( $\text{m s}^{-1}$ ) |
|--------------|----------------------------|--------|------|-----------------------------|-------|------|-----------------------|--------|------|---------------------------------------|
|              | $a$                        | $b$    | $c$  | $a$                         | $b$   | $c$  | $a$                   | $b$    | $c$  |                                       |
| $f(U_{GH})$  | 0.982                      | 0.0201 | 0.00 | 0.829                       | 0.213 | 0.32 | 0.0404                | 0.4247 | 0.00 | 6.1                                   |
| $f(U_{10m})$ | 0.98                       | 0.0137 | 0.00 | 0.886                       | 0.143 | 0.25 | 0.0312                | 0.427  | 0.00 | 8                                     |

- 20 **Table S2. Double-Altair transfer function coefficients for gauge-height (GH) and 10 m wind speeds. Coefficients for Eq. 2 and Eq. 1 are provided, along with the maximum wind speed threshold ( $U_{thresh}$ ), above which the transfer function should be applied by forcing the wind speed down to  $U_{thresh}$ . Also note that the Eq. 1 form of this function should only be used for  $T_{air} \leq 5$  °C. For  $T_{air} > 5$  °C, use the Eq. 1 type coefficients from K2017b.**

| Wind Speed   | Eq. 2, $f(U, mixed)$ |          |          | Eq. 2, $f(U, solid)$ |          |          | Eq. 1 $f(U, T_{air})$ |          |          | $U_{thresh}$<br>( $m s^{-1}$ ) |
|--------------|----------------------|----------|----------|----------------------|----------|----------|-----------------------|----------|----------|--------------------------------|
|              | <i>a</i>             | <i>b</i> | <i>c</i> | <i>a</i>             | <i>b</i> | <i>c</i> | <i>a</i>              | <i>b</i> | <i>c</i> |                                |
| $f(U_{GH})$  | 0.260                | 1.512    | 0.95     | 1.068                | 0.049    | 0.00     | 0.0146                | 0.27     | 0.05     | 6.1                            |
| $f(U_{10m})$ | 0.254                | 1.052    | 0.95     | 1.075                | 0.039    | 0.00     | 0.0110                | 0.29     | 0.08     | 8                              |

**Table S3.** Belfort double-Altair transfer function coefficients for gauge-height (GH) and 10 m wind speeds. Coefficients for Eq. 2 and Eq. 1 are provided, along with the maximum wind speed threshold ( $U_{thresh}$ ), above which the transfer function should be applied by forcing the wind speed down to  $U_{thresh}$ .

5

| Wind Speed   | Eq. 2, $f(U, mixed)$ |          |          | Eq. 2, $f(U, solid)$ |          |          | $U_{thresh}$<br>( $m s^{-1}$ ) |
|--------------|----------------------|----------|----------|----------------------|----------|----------|--------------------------------|
|              | <i>a</i>             | <i>b</i> | <i>c</i> | <i>a</i>             | <i>b</i> | <i>c</i> |                                |
| $f(U_{GH})$  | 0.492                | 0.00     | 0.492    | 0.187                | 0.410    | 0.875    | 6.1                            |
| $f(U_{10m})$ | 0.492                | 0.00     | 0.492    | 0.186                | 0.230    | 0.875    | 8                              |

**Table S4.** Small DFIR (SDFIR) transfer function coefficients for gauge-height (GH) and 10 m wind speeds. Coefficients for Eq. 2 are provided, along with the maximum wind speed threshold ( $U_{thresh}$ ), above which the transfer function should be applied by forcing the wind speed down to  $U_{thresh}$ . The recommended Eq. 1 type SDFIR transfer function is available in K2017b.
